1 **Localisation and tissue tropism of the symbiont *Microsporidia MB* in the germ line**  
2 **and somatic tissues of *Anopheles arabiensis***

3 Edward E. Makhulu<sup>†a</sup>, Thomas O. Onchuru<sup>†a,b</sup>, Joseph Gichuhi<sup>a</sup>, Fidel G. Otieno<sup>a</sup>, Anne  
4 W. Wairimu<sup>a</sup>, Joseph .N. Muthoni<sup>a</sup>, Lizette Koekoemoer<sup>c</sup> and Jeremy K. Herren<sup>1#</sup>

5  
6 <sup>a</sup>International Centre of Insect Physiology and Ecology (ICIPE), Kasarani, Nairobi, Kenya.

7 <sup>b</sup>Department of Physical and Biological Sciences, Bomet University College, Bomet,  
8 Kenya.

9 <sup>c</sup>Wits Research Institute for Malaria, University of the Witwatersrand, South Africa.

10

11 **Short title:** Tissue tropism of *Microsporidia MB* in *An. arabiensis*

12

13 **# Corresponding author:** Jeremy K. Herren, [jherren@icipe.org](mailto:jherren@icipe.org)

14 **Abstract**

15 The *Anopheles* symbiont, *Microsporidia MB*, is maternally inherited and has a strong  
16 malaria transmission-blocking phenotype in *Anopheles arabiensis*. *Microsporidia MB* is  
17 also vertically transmitted, sexually transmitted and avirulent. These characteristics are  
18 expected to promote its spread through mosquito populations, enhancing the potential of  
19 *Microsporidia MB* as a candidate for the development of a symbiont-mediated malaria  
20 transmission blocking strategy. We found that the patterns of *Microsporidia MB*  
21 localisation over the development of *An. arabiensis* indicate accumulation in tissues

22 linked to its transmission, specifically the male and female gonadal tissues. Transovarial  
23 vertical transmission of *Microsporidia MB* occurs in the female *An. arabiensis* ovary when  
24 *Microsporidia MB* becomes localised to the cytoplasm of the developing oocyte. In male  
25 *An. arabiensis*, *Microsporidia MB* is localised in the testis and vas deferens. Notably, a  
26 high intensity of *Microsporidia MB* can also be observed in the *An. arabiensis* adult but  
27 not larval gut. The levels of *Microsporidia MB* found in the female ovary are linked to the  
28 progression of oogenesis, increasing after blood feeding initiates the development of  
29 eggs. The levels of *Microsporidia MB* in the male and female gonadal and gut tissue do  
30 not increase as mosquitoes age. Altogether, the high specificity of *Microsporidia MB*  
31 tissue localisation patterns and changes in infection prevalence and intensity suggest  
32 adaptation to maximise transmission and avirulence in *Anopheles arabiensis*.

33

## 34 **Importance**

35 *Microsporidia MB* is a symbiont with strong malaria transmission-blocking phenotype in  
36 *Anopheles arabiensis*. It spreads in mosquito populations through mother-to-offspring  
37 and sexual transmission. The ability of *Microsporidia MB* to block *Plasmodium*  
38 transmission together with its ability to spread within *Anopheles* populations and its  
39 avirulence to the host makes it a very attractive candidate for developing a key strategy  
40 to stop malaria transmissions. Here, we report the basis of *Microsporidia MB*  
41 transmission. We find that *Microsporidia MB* accumulates in *Anopheles arabiensis* tissues  
42 linked to its sexual and vertical transmission. Its prevalence and intensity in the tissues  
43 over the mosquito life cycle suggest adaptation to maximise transmission and avirulence

44 in *Anopheles arabiensis*. These findings provide the foundation for understanding the  
45 factors that affect *Microsporidia MB* transmission efficiency. This will contribute to the  
46 establishment of strategies to maximize *Microsporidia MB* transmission for *Anopheles*  
47 mosquito population replacement and malaria transmission blocking.

48

49 **KEYWORDS:** *Microsporidia MB*, Malaria vectors, symbiotic microbes

50

## 51 **Introduction**

52 The malaria disease burden remains a major impediment to good health and economic  
53 development in many regions of sub-Saharan Africa (SSA). In 2021, a total of 247 million  
54 cases were reported that resulted in 619,000 deaths, a strong indication that current  
55 control measures and their deployment levels are insufficient (1). Large-scale insecticide  
56 treated net (ITN) distribution campaigns have had a significant impact on reducing the  
57 number of malaria cases (2). However, many malaria vectors have now developed  
58 resistance to the insecticides used in ITNs (3) and they are increasingly biting outdoors,  
59 where nets offer no protection (4). In addition, many malaria control efforts were  
60 significantly disrupted by the COVID-19 pandemic (5) and the recent invasion of *An.*  
61 *stephensi* across Africa is leading to a significant rise in malaria transmission (6–8).  
62 Altogether, these factors threaten to reverse the gains achieved for malaria reduction and  
63 indicate an urgent need for new strategies to control *Anopheles* mosquito populations or  
64 their capacity to transmit *Plasmodium* parasites.

65 A novel and potentially transformative method of controlling vector-borne disease  
66 involves the use of transmission blocking symbionts. For dengue, a control strategy based  
67 on the transmission blocking symbiont *Wolbachia* has been highly effective and  
68 controlled field trials are currently implemented in over 13 countries (9). A similar strategy,  
69 based on a *Plasmodium* transmission-blocking symbiont in *Anopheles* mosquitoes could  
70 be transformative for controlling malaria. The microsporidian symbiont, *Microsporidia MB*,  
71 is naturally found in anopheline mosquito populations and has been shown to block  
72 *Plasmodium* development (10). In addition, *Microsporidia MB* is both vertically and  
73 sexually transmitted (11). In conjunction with the *Plasmodium* blocking, the high efficiency  
74 of vertical and sexual transmission of *Microsporidia MB*, which could facilitate the spread  
75 and maintenance of *Microsporidia MB* in *Anopheles* mosquito populations, has led to the  
76 suggestion that this symbiont could be deployed as a new tool for malaria control (12).

77 The success of a *Microsporidia MB*-based malaria control strategy will depend on efficient  
78 vertical and horizontal transmission of the symbiont, which would enable the spread and  
79 maintenance of *Microsporidia MB* in *Anopheles* vector populations. For symbionts that  
80 are vertically and sexually transmitted, avirulence towards the host can be expected (13).  
81 Vertically and sexually transmitted symbionts can be selected for their ability to enhance  
82 host fitness (14, 15). The tissue level localisation pattern and intensity of infection have  
83 been shown to play an important role in symbiont transmission and host fitness effects.  
84 Currently, little is known regarding *Microsporidia MB* localization patterns in infected  
85 mosquitoes. Here, we investigated the tissue-level localisation and changes of  
86 *Microsporidia MB* infection intensity across development of *An. arabiensis*. We found that  
87 *Microsporidia MB* was predominately found in the reproductive organs of *An. arabiensis*

88 males and females. Additionally, we observed *Microsporidia MB* inside developing  
89 oocytes in the *An. arabiensis* ovaries, indicating transovarial vertical transmission.  
90 Interestingly, the intensity of *Microsporidia MB* infection in the female ovaries increased  
91 after blood feeding. The prevalence and intensity of *Microsporidia MB* infection in the  
92 female ovaries was found to decrease as *An. arabiensis* mosquitoes aged. In male *An.*  
93 *arabiensis*, *Microsporidia MB* is found in the testis and vas deferens offering further  
94 confirmation of the basis of male to female sexual transmission as previously reported  
95 (11). *Microsporidia MB* is also in found in the *An. arabiensis* adult intestine at moderate  
96 prevalences. Notably, *Microsporidia MB* is always absent from the larval intestine but  
97 present in the larval body.

98

## 99 **Results**

### 100 **The *An. arabiensis* male and female gonads are the primary site of *Microsporidia*** 101 ***MB* infection in *An. arabiensis***

102 The prevalence and intensity of *Microsporidia MB* was investigated in the gonads, gut fat-  
103 body and carcass of seven-day-old adult *An. arabiensis* by qPCR (Figure 1). We show  
104 that *An. arabiensis* male and female gonads had the highest *Microsporidia MB* prevalence  
105 (Figure 1A) and the highest absolute intensity of *Microsporidia MB* infection in comparison  
106 to other tissues and the carcass (Figures 1B-1D). In female and male *An. arabiensis*, the  
107 gonads also had higher mean *Microsporidia MB* intensities relative to host gene copy  
108 number (relative *Microsporidia MB* intensity) than fat bodies and carcasses. These  
109 findings indicate that the primary site of *Microsporidia MB* infection in both male and  
110 female adult *An. arabiensis* was the gonadal tissue. This is in line with a study that

111 investigated *Microsporidia MB* in only male *An. arabiensis* (11). A moderate prevalence  
112 of *Microsporidia MB* infection was observed in the *An. arabiensis* male gut (54%, Figure  
113 1A). In addition, the mean relative *Microsporidia MB* intensity in the male gut was  
114 significantly higher than the fat body and carcass (Figure 1E), indicating that  
115 *Microsporidia MB* density can reach high levels in this tissue. In females, the relative  
116 intensity of *Microsporidia MB* in the gut was not significantly different from the relative  
117 intensity in the gonads (Figure 1C). Altogether, these findings suggest that the gut is likely  
118 to be the secondary site of infection. In both sexes, the prevalence and intensity of  
119 *Microsporidia MB* was lowest in the fat body (Figure 1A-E).

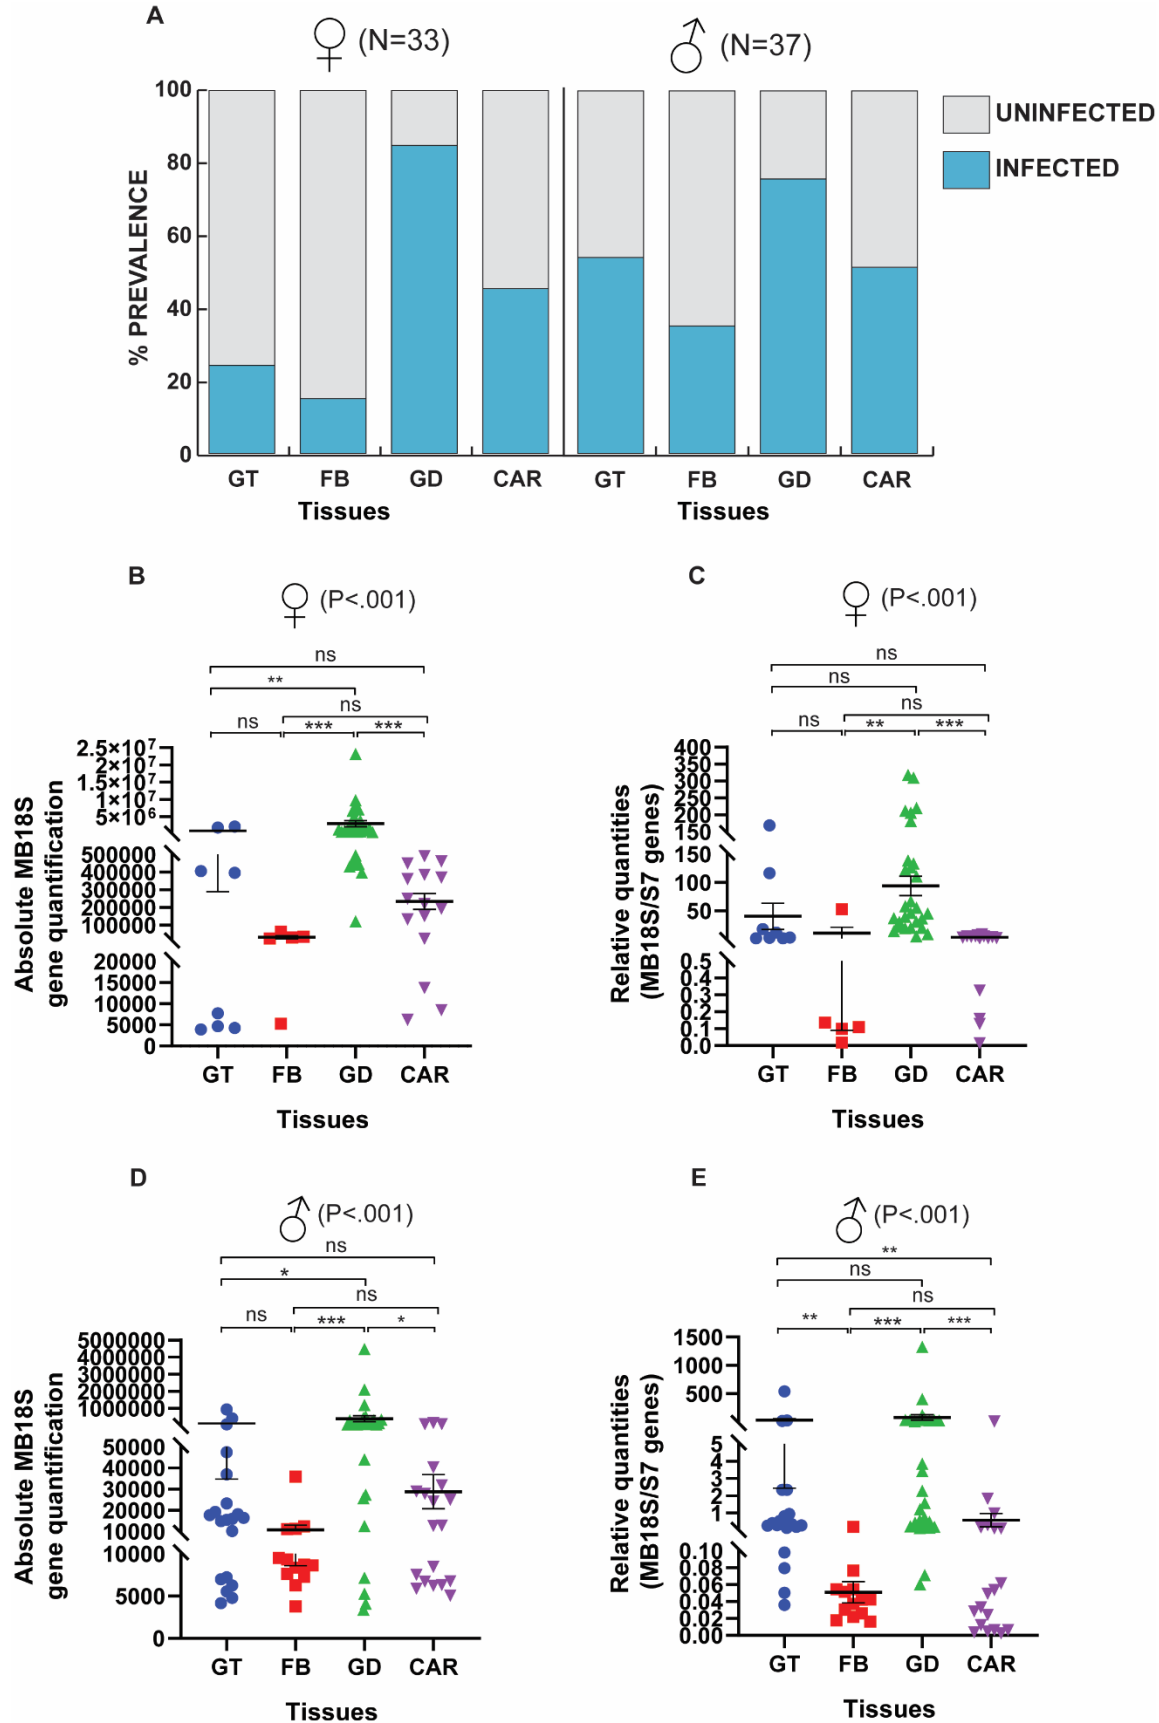

121 **Figure 1. *Microsporidia MB* infection prevalence and intensity in adult *An. arabiensis* tissues. (A)**

122 The prevalence of *Microsporidia MB* is highest in the gonads of male and female *An. arabiensis* in  
123 comparison to other somatic tissues and the carcass. The absolute *Microsporidia MB* intensity was higher  
124 in female **(B)** (Dunn's post hoc test, GT vs GD P =0.008, FB vs GD P<0.001, CAR vs GD P<0.001) and  
125 male **(C)** (Dunn's post hoc test, GT vs GD P =0.019, FB vs GD P<0.001, CAR vs GD P =0.011) gonads  
126 relative to somatic tissues. **(D)** The relative intensity of *Microsporidia MB* in the female *An. arabiensis* midgut  
127 is not significantly different from the gonads. **(E)** The relative *Microsporidia MB* intensity determined by  
128 qPCR was significantly higher in the male gut in comparison to the fat body and carcass.

129 (Abbreviations: **GT** – Gut, **FB** – Fat bodies, **GD** – Gonads, **CAR** – Carcass)

130 ***Microsporidia MB* cells are identified by microscopy in oocytes in female and testis**  
131 **and gut in male *An. arabiensis***

132 To better understand where *Microsporidia MB* is located inside the male and female *An.*  
133 *arabiensis* gonads and guts, we visualised these tissues using Fluorescent In-Situ  
134 Hybridization (FISH) and confocal microscopy. The visualisation of *Microsporidia MB*  
135 confirmed that male and females *An. arabiensis* gonads were the primary site of infection  
136 (Figure 2A-2B). In the *An. arabiensis* female gonad, *Microsporidia MB* is observed in all  
137 stages of egg chamber development as well as the germ-line stem cells (Figure 2A). As  
138 the oocytes enter vitellogenesis, higher intensities of *Microsporidia MB* are observed. In  
139 the male gonad, *Microsporidia MB* is observed in the testis and vas deferens, in close  
140 proximity to developing sperm cells (Figure 2B). In the *An. arabiensis* male gut,  
141 *Microsporidia MB* is occasionally observed at high infection levels in a small number of  
142 cells in the midgut and hindgut regions (Figure 2C).



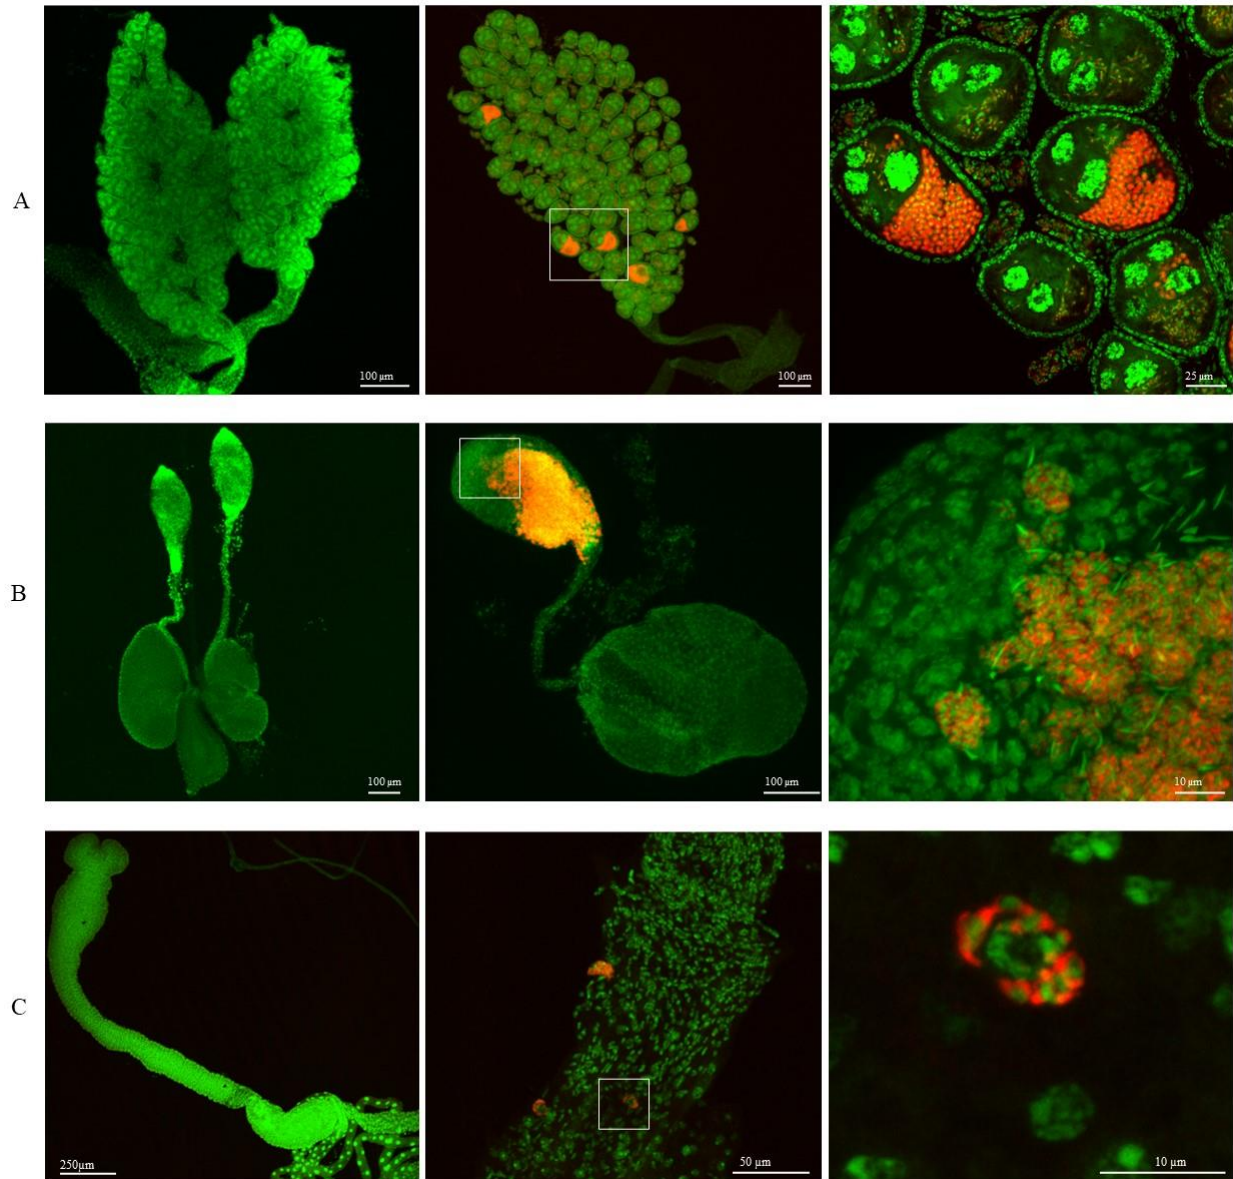

143

144 **Figure 2. *Microsporidia MB* localisation to cells in the male and female gonads and male gut.**

145 *Microsporidia MB* infection is observed by FISH and confocal fluorescence microscopy in the gonads and

146 gut of *An. arabiensis* mosquitoes. **(A)** *Microsporidia MB* in the female *An. arabiensis* gonads. A high density

147 of *Microsporidia MB* is observed in vitellogenic oocytes. **(B)** *Microsporidia MB* in the male *An. arabiensis*

148 gonad. A high density of *Microsporidia MB* is observed in parts of the testis. **(C)** *Microsporidia MB* is

149 observed in the *An. arabiensis* male midgut cells.

150 ***Microsporidia MB* is not found in the larval gut and is higher in female adult**  
151 **mosquitoes**

152 To better understand where *Microsporidia MB* is located during the larval stage of *An*  
153 *arabiensis*, L4 larval stages were dissected to separate the gut from the carcass, with  
154 carcasses containing all the remaining larval tissue, including the hemolymph. We  
155 observed that none of the gut samples were infected with *Microsporidia MB* (Figure 3A).  
156 However, larval carcasses were found to have a high prevalence of *Microsporidia MB*  
157 infection. The absolute intensity of *Microsporidia MB* infection in *An. arabiensis* larvae  
158 was significantly less than that observed in adult female but not male mosquitoes (Figure  
159 3B).

160

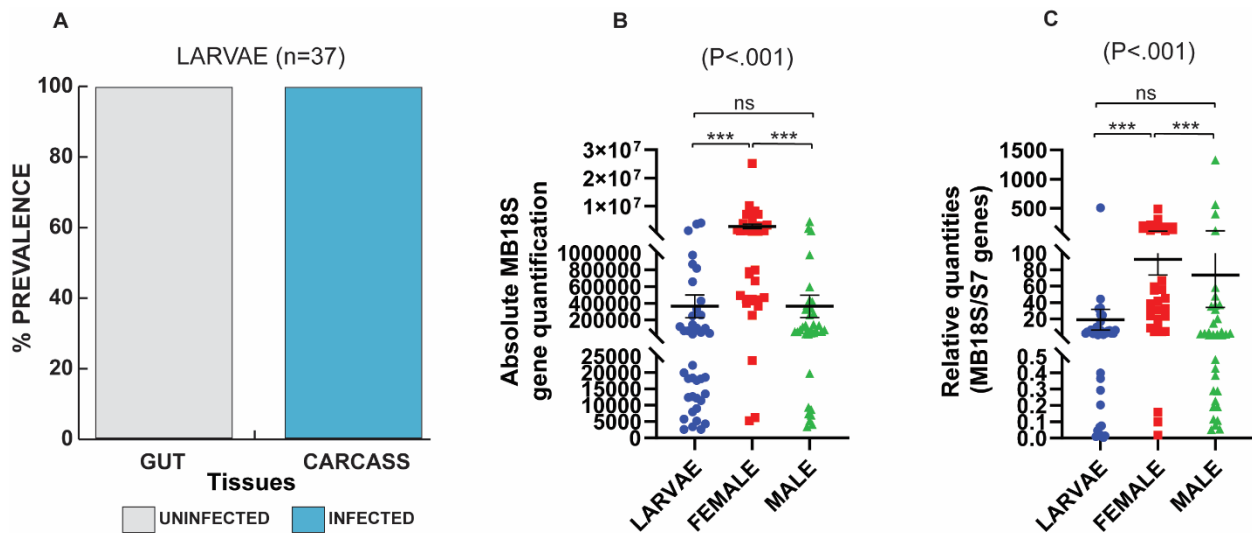

161

162 **Figure 3. Localisation of *Microsporidia MB* in larval tissues and comparison of its density between**  
163 **larvae and adult mosquito stages. (A)** *Microsporidia MB* is present in the carcass of dissected L4 larvae  
164 but not in the gut. *Microsporidia MB* infection intensity is only higher in *An. arabiensis* adult females relative  
165 to L4 larvae both in an absolute quantification ( $P < 0.001$ ) (B) and a relative quantification ( $P < 0.001$ ) (C)  
166 upon conducting a pairwise comparisons using Dunn's test.

167 **Blood meal affects the intensity of *Microsporidia MB* in the ovaries**

168 In *An. arabiensis*, oogenesis begins after female mosquitoes eclose but is arrested until  
169 females take a blood meal. To determine if the intensity of *Microsporidia MB* in *An.*  
170 *arabiensis* is affected by the onset of egg development and other physiological changes  
171 associated with taking a blood meal, we compared the prevalence and intensity of  
172 *Microsporidia MB* infection in the guts and gonads of *An. arabiensis* females that had fed  
173 on a blood meal with those that had not fed on a blood meal. In the *An. arabiensis* female  
174 gut, the prevalence of *Microsporidia MB* was slightly lower in blood fed mosquitoes  
175 relative to non-blood fed mosquitoes (Figure 4A). While there was a significantly higher  
176 relative intensity of *Microsporidia MB* in female *An. arabiensis* guts that had been blood  
177 fed, the absolute levels of *Microsporidia MB* were not significantly different between the  
178 two groups (Figure 4C and 4E). This discrepancy is likely the result of the turnover (and  
179 shedding) of gut epithelial cells that is known to occur after blood feeding, which could  
180 decrease the amount of host DNA in this tissue (16,17). The prevalence of *Microsporidia*  
181 *MB* infection was high in ovaries regardless of the blood feeding status (Figure 4B).  
182 However, we observed significantly higher relative and absolute intensities of  
183 *Microsporidia MB* in gonads of blood fed *An. arabiensis* (Figure 4D and 4F). These  
184 observations suggests that the amount and density of *Microsporidia MB* in the female  
185 gonad increases as the gonotrophic cycle progresses and egg development is initiated.

186

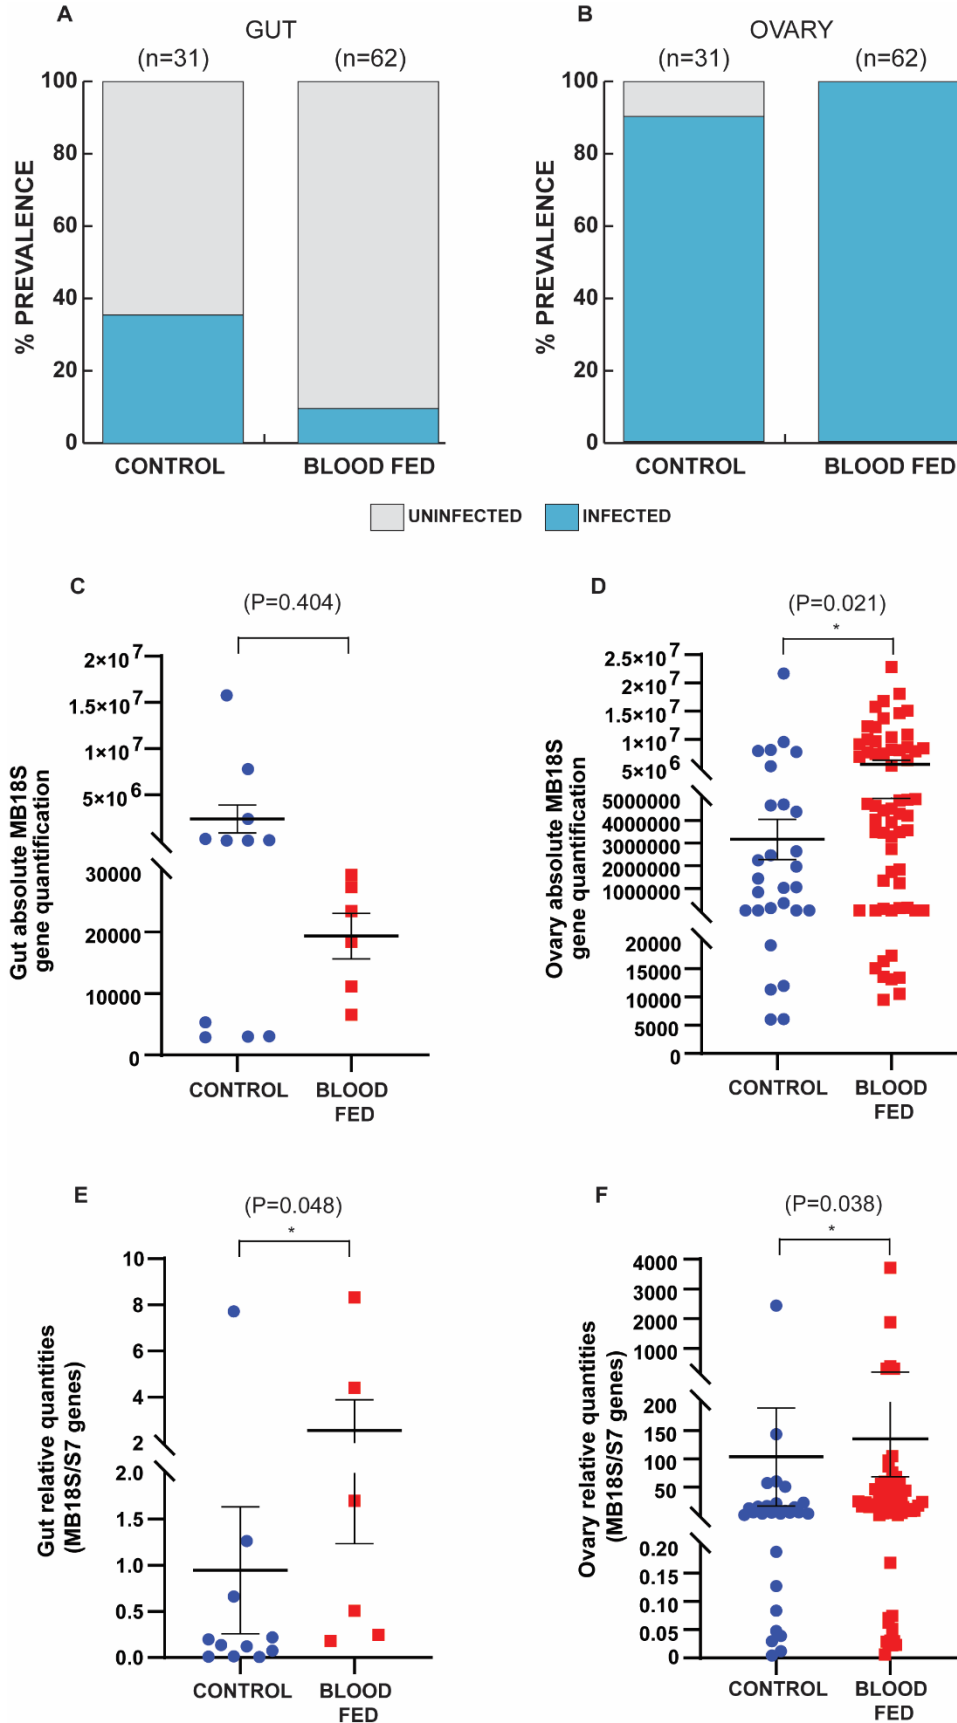

188 **Figure 4. *Microsporidia* MB prevalence and intensity in female *An. arabiensis* gonads is affected by**  
189 **blood feeding. (A)** The prevalence of *Microsporidia* MB infection is slightly lower in the guts of blood fed  
190 *An. arabiensis* females. **(B)** The prevalence of *Microsporidia* MB infection is high in blood fed and non-  
191 blood fed *An. arabiensis* female gonads. **(C)** The absolute intensity of *Microsporidia* MB infection is not  
192 significantly different between the guts of blood fed and non-blood fed *An. arabiensis* females (two-tailed  
193 Mann–Whitney test,  $P = 0.404$ , error bars reflect SEM). **(D)** The absolute intensity of *Microsporidia* MB  
194 infection is significantly higher in the gonads of blood fed *An. arabiensis* females (two-tailed Mann–Whitney  
195 test,  $P = 0.021$ , error bars reflect SEM). **(E)** The relative intensity of *Microsporidia* MB infection is  
196 significantly higher in the guts of blood fed *An. arabiensis* females (two-tailed Mann–Whitney test,  $P = 0.048$ ,  
197 error bars reflect SEM). **(F)** The relative intensity of *Microsporidia* MB infection is higher in the gonads of  
198 blood fed *An. arabiensis* females (two-tailed Mann–Whitney test,  $P = 0.038$ , error bars reflect SEM).  
199

200 **Age affects the intensity of *Microsporidia* MB density in *An. arabiensis* gonads and**  
201 **guts**

202 To investigate the effect of aging on the prevalence and intensity of *Microsporidia* MB in  
203 *An. arabiensis* gonadal and gut tissue, male and female *An. arabiensis* were aged for 2,  
204 7 and 14 days prior to dissection of tissues and quantification of *Microsporidia* MB by  
205 qPCR. The prevalence of *Microsporidia* MB in the guts of female *An. arabiensis* was  
206 slightly higher in the 14-day old mosquitoes relative to 2- and 7-day old mosquitoes  
207 (Figure 4A). The prevalence of *Microsporidia* MB in the guts of male *An. arabiensis* did  
208 not change as mosquitoes were aged (Figure 4B). In both males and females, there was  
209 a general trend towards a decrease in the prevalence of *Microsporidia* MB in gonads as  
210 mosquitoes were aged (Figure 4A-4B). There was a slight increase in the relative  
211 intensity, but not absolute intensity of *Microsporidia* MB in the guts of female *An.*

212 *arabiensis* between 2- and 14 days (Figure 4C-4D). The intensity of *Microsporidia MB* in  
213 the guts of male *An. arabiensis* was apparently not affected by aging (Figure 4G-4H). The  
214 relative intensity of *Microsporidia MB* in female *An. arabiensis* gonads increased between  
215 day 2 and 7, however, the absolute levels remained constant (Figure 4E-4F). This  
216 suggests that the increase in relative *Microsporidia MB* intensity is a consequence of host  
217 DNA content decreasing. Notably, the absolute, but not relative, intensity of *Microsporidia*  
218 *MB* was lower in the gonads of 14 day old females relative to 2 and 7 day old females  
219 (Figure 4E-4F). The relative intensity of *Microsporidia MB* in the *An. arabiensis* male  
220 gonad increased between 2 and 7 days of aging (Figure 4I). The absolute intensity of  
221 *Microsporidia MB* in the male gonad was not significantly different across all ages (Figure  
222 4J).

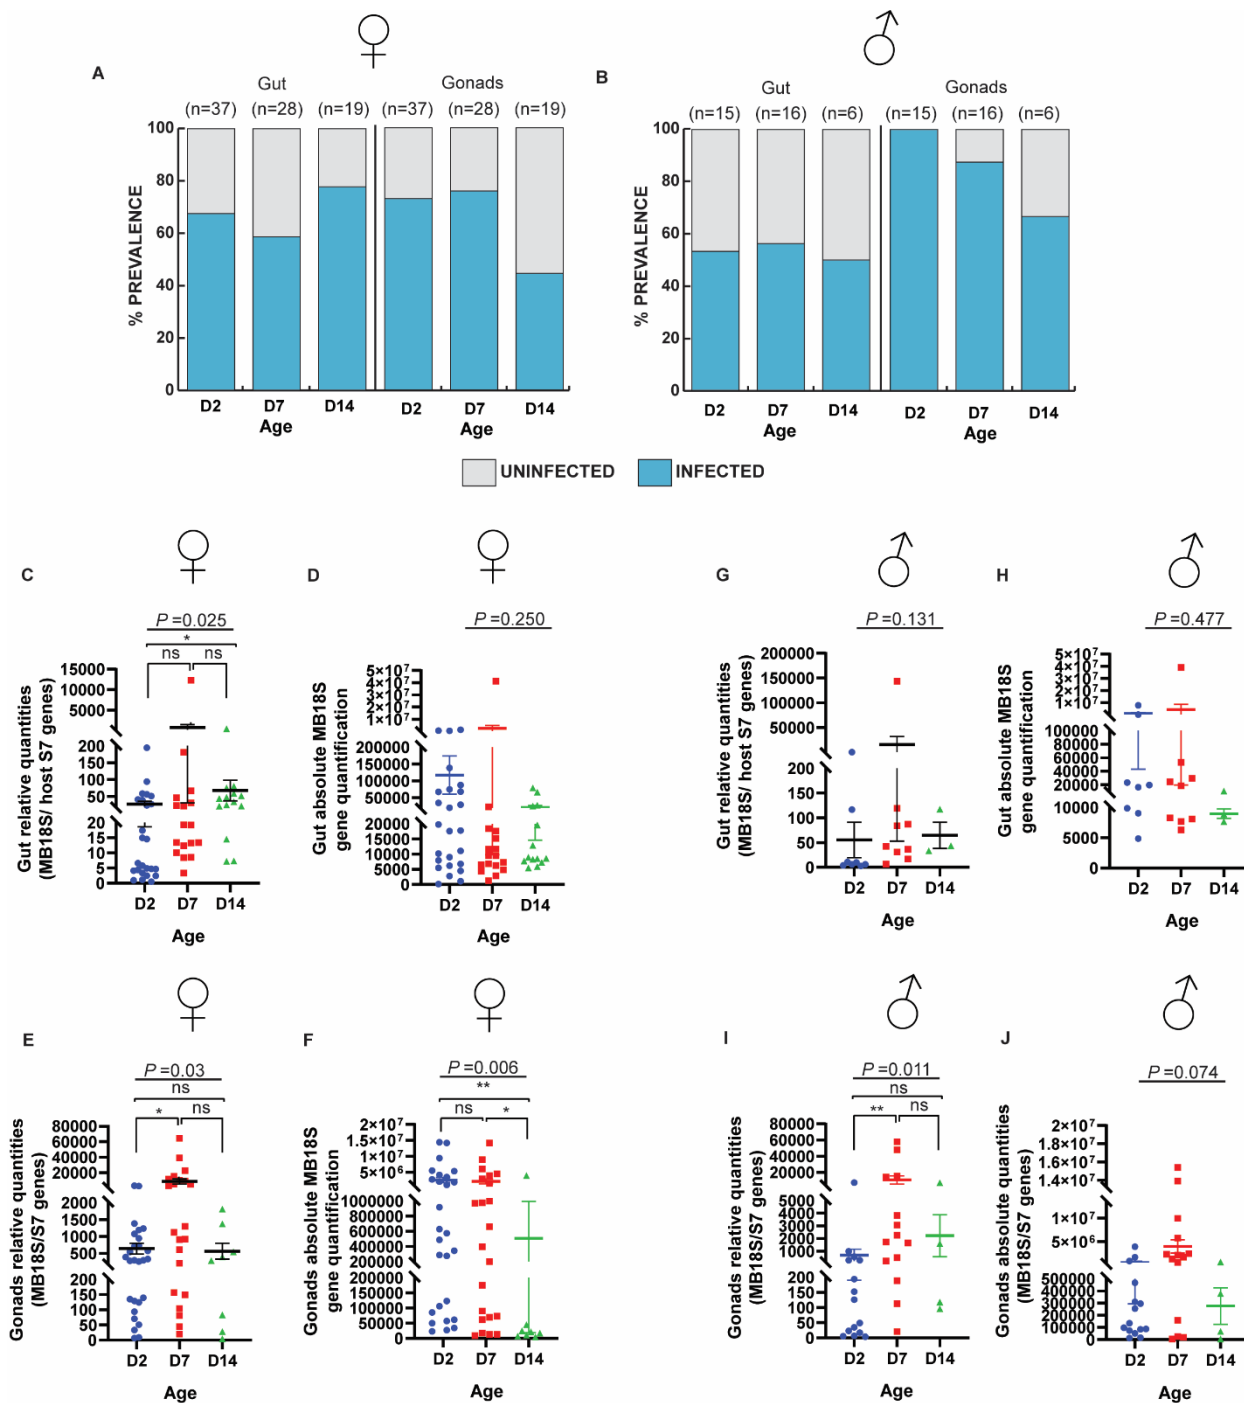

223

224 **Figure 5. The intensity of *Microsporidia MB* in the *An. arabiensis* gonad and gut is affected by age.**

225 **(A)** The prevalence of *Microsporidia MB* in the guts of female *An. arabiensis* was slightly higher at 14 days

226 relative to seven and two days. A decrease in the prevalence of *Microsporidia MB* is observed in the gonads

227 of 14-day old female *An. arabiensis*. **(B)** The prevalence of *Microsporidia MB* in the guts of male *An.*

228 *arabiensis* did not change as mosquitoes were aged. A decrease in the prevalence of *Microsporidia MB* is  
229 observed in the gonads of 14-day old male *An. arabiensis*. **(C-D)** An increase in the relative intensity (Dunn's  
230 post hoc test,  $P = 0.022$ ), but not absolute intensity, of *Microsporidia MB* is observed in the guts of female  
231 *An. arabiensis* between 2- and 14 days. **(E-F)** The relative intensity (Dunn's post hoc test,  $P = 0.046$ ), but  
232 not absolute intensity, of *Microsporidia MB* in female *An. arabiensis* gonads increased between day two  
233 and seven. The absolute intensity of *Microsporidia MB* was lower in the gonads of 14-day old females  
234 relative to (Dunn's post hoc test,  $P = 0.005$ ) and seven (Dunn's post hoc test,  $P = 0.022$ ) females. **(G-H)** The  
235 intensity of *Microsporidia MB* in the guts of male *An. arabiensis* does not change over aging. **(I-J)** The  
236 relative intensity of *Microsporidia MB* in the *An. arabiensis* male gonad increased between two and seven  
237 days of aging (Dunn's post hoc test,  $P = 0.008$ ). The absolute intensity of *Microsporidia MB* in the male  
238 gonad was not significantly different across all ages.

## 239 **Discussion**

240 The results demonstrate that the gonads of male and female *An. arabiensis* are the  
241 primary sites of *Microsporidia MB* infection. This finding indicates that maternal and  
242 sexual transmission are likely to be the most important *Microsporidia MB* infection routes.  
243 Both maternal and sexual transmission require that *An. arabiensis* hosts do not incur  
244 excessive fitness costs when infected with *Microsporidia MB* (13). In line with this,  
245 *Microsporidia MB* does not have a major effect on the fitness of larvae or adult female  
246 mosquitoes (10). It remains unresolved how *Microsporidia MB* can reach very high  
247 intensities, up to  $2.5 \times 10^7$  copies of the *Microsporidia MB* 18S gene per mosquito, without  
248 negatively impacting host fitness.

249 Other insect endosymbionts, including *Wolbachia*, have intensity-dependent effects on  
250 host fitness (18). It is therefore possible that very high intensity *Microsporidia MB*  
251 infections do have a fitness cost, but this would need further investigation. The link



252 between *Wolbachia* intensity and host fitness is complex and, in many cases, fitness is  
253 not affected by high endosymbiont intensities (19). It is likely that the pattern of  
254 endosymbiont localisation in host tissues has important fitness consequences for  
255 endosymbionts such as *Wolbachia* and *Microsporidia MB*. A strain of *Wolbachia*,  
256 wMelPop, that over proliferates and decreases host fitness has been found at high  
257 intensities in the central nervous system and muscles of its insect hosts (20, 21). It is  
258 possible that endosymbionts mitigate effects on host fitness by limiting most of the  
259 infection and proliferation to certain tissues.

260 Our findings indicate that *Microsporidia MB* is primarily found in gonadal tissue and this  
261 is suggestive adaptation to minimise host fitness costs without compromising  
262 transmission. Fluorescence confocal microscopy revealed that *Microsporidia MB* was  
263 present in oocytes and nurse cells across all stages of oogenesis. These findings clearly  
264 demonstrate that *Microsporidia MB* maternal transmission is transovarial, which explains  
265 the need for higher *Microsporidia MB* intensities to be maintained in the female gonads.

266 In the male germline, *Microsporidia MB* is primarily localised to the testis and vas  
267 deferens. The testis is the site of sperm production, comprising of a proximal end with  
268 stem cell divisions, spermatocysts in different stages of development and a distal  
269 spermatozoa reservoir (22). In *An. arabiensis*, we observed *Microsporidia MB* cells as  
270 clusters in the spermatocyst and spermatozoa reservoir regions of the testis and more  
271 rarely in the stem cell region. These findings suggest that *Microsporidia MB* is packaged  
272 with spermatozoa at their early development stages.

273 We observed very low levels of *Microsporidia MB* in the *An. arabiensis* adult fat body.  
274 Pathogenic Microsporidians are known to infect and proliferate in the insect fat body (22).  
275 It is likely that as the primary energy storage tissue, fat bodies provide the nutrients  
276 required for this proliferation. The low levels of *Microsporidia MB* in the adult fat body of  
277 *An. arabiensis* could be part of the explanation for its avirulence in *An. arabiensis*. The  
278 moderate levels of *Microsporidia MB* in the carcass samples, which contained all the  
279 tissues apart from gut, gonads and fat body, suggest that we cannot exclude there being  
280 another *Microsporidia MB* infection reservoir in adult *An. arabiensis*.

281 In the adult *An. arabiensis* gut, there were a small proportion of samples which had very  
282 high intensities of *Microsporidia MB*. The significance of these high intensity gut infections  
283 is yet to be resolved. Fluorescence confocal microscopy revealed that *Microsporidia MB*  
284 was found at very high densities in a small subset of cells in the adult male mid and  
285 hindgut. The shape and positioning of these cells suggests that they could be intestinal  
286 stem cells (17). It is notable that in contrast to adults, *Microsporidia MB* was never  
287 observed in the larval gut. A possible explanation for this is that presence in the larval gut  
288 could have prohibitive fitness cost since larvae feed continuously. In addition, the total  
289 intensity of *Microsporidia MB* is lower in larvae relative to adult females.

290 We also investigated how localisation and *Microsporidia MB* intensity changes over the  
291 life cycle of *An. arabiensis*. In *An. arabiensis*, oogenesis starts when mosquitoes elcose,  
292 but is then paused until females take a blood meal (24). Once females take a blood meal,  
293 several physiological changes occur that enable the blood to be digested an ultimately to  
294 meet nutritional demands of egg production (25). Since there are major changes  
295 occurring in the gut and gonads of females post blood feeding, we investigated the

296 changes in the levels of *Microsporidia MB* in these tissues. We observed that the levels  
297 of *Microsporidia MB* in the gut did not change in response to blood feeding; the relative  
298 intensity of *Microsporidia MB* did increase in the gut after blood feeding but the absolute  
299 intensity appeared to be constant, which suggests a decrease in host nuclear gene copy  
300 number. This decrease is likely to be linked to the process of gut epithelium renewal (17).  
301 In contrast, we observed a marked increase in the intensity of *Microsporidia MB* in the  
302 female gonad after blood feeding. Notably, *Microsporidia MB* is observed at high  
303 intensities in the later (vitellogenic) stages of oogenic development, which develop after  
304 the blood meal induced initiation of oogenesis (24). Therefore, the proliferation of  
305 *Microsporidia MB* in vitellogenic oocytes is a possible explanation for the increase in  
306 intensity of *Microsporidia MB* after blood feeding.

307 We did not observe *Microsporidia MB* levels increasing as male or female guts and  
308 gonads as *An. arabiensis* mosquitoes are aged. This pattern of growth is consistent with  
309 symbionts that regulate proliferation to mitigate fitness costs (26). While there was an  
310 increase in the relative intensity of *Microsporidia MB* in male and female gonads between  
311 day 2 and day 7, this is likely to be the consequence of a decrease in host nuclear gene  
312 copy number. Notably, there was a significant decrease in the prevalence and absolute  
313 intensity of *Microsporidia MB* in female gonads between 7 and 14 days of aging. This may  
314 be indicating a loss of *Microsporidia MB* from germline cells after numerous rounds of  
315 division and an inability for these cell to be re-infected. However, the aged *An. arabiensis*  
316 female mosquitoes had not been blood fed and therefore had not completed any  
317 gonotrophic cycles which could be expected to lower the rate of stem cell division (27).

318 Overall, our findings suggest that *Microsporidia MB* localisation patterns may serve to  
319 maximise transmission success while minimising negative effects on host fitness.  
320 *Microsporidia MB* has proliferation and localisation patterns that are consistent with a co-  
321 evolved symbiont that exploits sexual and vertical transmission routes. A better  
322 understanding of changes in localisation and symbiont intensity across the *An. arabiensis*  
323 lifecycle will contribute to improving *Microsporidia MB* infected mosquito rearing and aid  
324 in the formulation of strategies to disseminate *Microsporidia MB*.

## 325 **Materials and methods**

### 326 **Mosquito sample collection**

327 Wild-caught gravid adult female *Anopheles gambiae s.l.*, were collected using mouth  
328 aspiration. Collected mosquitoes were identified morphologically to the species level and  
329 sub-species identification of *Anopheles gambiae s.l.*, was carried out by PCR (28).  
330 Sampling was conducted from one site in Kenya, the Ahero irrigation scheme (–  
331 34.9190W, –0.1661N). The mosquitoes used in this study were collected between  
332 September 2021 and October 2021. Sampled mosquitoes were transported to the *icipe* -  
333 Duduville campus in Nairobi and maintained on 6% glucose and water.

### 334 **Mosquito processing and development of isofemale lines**

335 Wild collected mosquitoes were maintained in an insectary at  $27 \pm 2.5^{\circ}\text{C}$ , humidity 60–  
336 80% and 12-h day and 12-h night cycles and induced to oviposit in individual  
337 microcentrifuge tubes containing a wet 1 cm × 1 cm Whatman filter paper. Eggs from  
338 each female were counted under a compound microscope using a paint brush and then

339 dispensed into water troughs for larval development at 30.5°C and 30–40% humidity.  
340 Tetramin™ baby fish food was used to feed developing larvae. Upon laying eggs, the  
341 G<sub>0</sub> females were screened for presence of *Microsporidia MB* by PCR. The larval offspring  
342 of *Microsporidia MB* positive field-caught female mosquitoes were transferred into larval  
343 rearing troughs for further development. Upon reaching the L4 larval stage, representative  
344 samples from each positive isofemale line were screened to determine the *Microsporidia*  
345 *MB* infection status of the line. Were mosquitos were maintained as adults, this was done  
346 in an insectary at 30°C, with a relative humidity of 75% and 12-h day and 12-h night cycles  
347 and a feeder with 6% glucose solution.

#### 348 **Larval and adult dissection**

349 *An. arabiensis* G1 larvae and adult mosquitoes were dissected using forceps under the  
350 Zeiss Stemi 2000-C stereomicroscope to obtain G1 L4 larval and adult *Anopheles* tissues.  
351 During the dissection of the L4 larvae, alive samples were placed on a drop of 1X  
352 Phosphate Buffered Saline (1X PBS). The larvae were restrained at the junction between  
353 the head and thorax with a pair of forceps. A dissecting needle pin was then used to probe  
354 the intersection between the second and last abdomen segments. The siphon and saddle  
355 of the larvae were held and pulled gently to obtain the gut of the larvae using a new pair  
356 of forceps. The carcass and the gut were placed in separate 1.5 micro-centrifuge tubes  
357 containing 20µl of 1X PBS and 0.5mm zirconium beads for DNA extractions. For adults,  
358 G1 mosquito samples were first anaesthetised for a few minutes until immobilised by  
359 aspirating them in 1.5 micro-centrifuge tubes and placing them in ice. Upon  
360 immobilisation, the mosquitoes were placed in a drop of 1X PBS on a glass slide. The  
361 junction between the last and second-last abdomen was probed using a dissecting

362 needle. The last segment was gently pulled to release the gonads and the gut. The gut  
363 and gonads were separated and placed in separate 1.5 micro-centrifuge tubes containing  
364 20µl of 1X PBS and 0.5mm zirconium beads ready for nucleic acid extractions. Similarly,  
365 the fat bodies and carcass (all remaining tissue) and were also separated and placed in  
366 separate 1.5 micro-centrifuge tubes as described above. Forceps were sterilised after  
367 every dissection to prevent contamination.

368

### 369 **Mosquito blood feeding**

370 Two to three-day-old *Microsporidia MB* positive and negative *An. arabiensis* mosquitoes  
371 maintained at a temperature of 30°C, and a relative humidity of 75 % were starved for 2  
372 hours without water or glucose in preparation for blood feeding. Membrane feeding was  
373 conducted according to (29). Briefly, bovine blood was transferred into a Hemotek®  
374 feeding apparatus (Hemotek, UK) with a Parafilm-A membrane set at. The Hemotek  
375 feeding apparatus was placed on top of a cage of starved *An. arabiensis* mosquitoes and  
376 feeding was allowed to take place for 1hr. Fully engorged *An. arabiensis* were transferred  
377 to new cages, maintained for five days post-infection, and later dissected to obtain the  
378 gut and ovaries which were screened for *Microsporidia MB* presence and levels.

### 379 **Flourescent *in-situ* hybridisation (FISH) localisation**

380 Dissected tissues were fixed overnight in 4% Paraformaldehyde (PFA) at 4 °C. After  
381 fixation, the samples were rehydrated in 50% ethanol for 30 minutes and transferred to  
382 1X PBS for another 30 minutes. FISH was then conducted to localize *Microsporia MB*  
383 within the tissues. Hybridization was done by incubating the tissues in 100µl of  
384 hybridization buffer overnight at 50°C. The FISH hybridization mix contained hybridization

385 buffer (dH<sub>2</sub>O, 5M NaCl, 1M Tris/HCl [pH=8], and 10% SDS), *Microsporidia MB* specific  
386 CY5 probe (10), 0.5µM final concentration, and SYTOX Green general DNA staining.  
387 After staining, the samples were washed twice with 100µl of prewarmed wash buffer  
388 (dH<sub>2</sub>O, 5M NaCl, 1M Tris/HCl [pH=8], 0.5M EDTA, and 10% SDS). The tissues were then  
389 placed on a slide and visualized immediately using a Leica SP5 confocal microscope  
390 (Leica Microsystems, USA). The images were analyzed with the ImageJ 1.50i software  
391 package (30).

392

### 393 **DNA extraction and molecular detection and quantification of *Microsporidia MB***

394 DNA was extracted using the ammonium acetate protein precipitation method (10).  
395 Extracted DNA samples were screened to determine their *Microsporidia MB* infection  
396 status using the *Microsporidia MB* specific primers (MB18SF: CGCCGG  
397 CCGTGAAAAATTTA and MB18SR: CCTTGGACGTG GGAGCTATC) targeting the  
398 *Microsporidia MB* 18S rRNA region (10). The PCR reaction used in detection comprised  
399 a 10 µl reaction consisting of 2 µl HOTFirepol Blend Master mix Ready-To-Load (Solis  
400 Biodyne, Estonia), 0.5 µl of 5 pmol/µl forward and reverse primers, 2 µl of the DNA  
401 template, and 5 µl nuclease-free PCR water was undertaken. The thermocycling  
402 conditions employed were initial denaturation at 95°C for 15 min, followed by 35 cycles of  
403 denaturation at 95°C for 1 min, annealing at 62°C for 90 s, and extension at 72°C for a  
404 further 60 s. Final elongation was done at 72°C for 5 min. Samples positive for  
405 *Microsporidia MB* were subjected to relative and absolute qPCR analysis to quantify  
406 infection levels (10, 31). The qPCR analysis involved the MB18SF/ MB18SR primers,  
407 normalised with the *Anopheles* ribosomal S7 gene (primers, S7F:

408 TCCTGGAGCTGGAGATGAAC and S7R: GACGGGTCTGTACCTTCTGG) as the  
409 reference host gene. The 10µl PCR reaction consisted of 2µl HOT FIREPol® EvaGreen®  
410 HRM no ROX Mix Solis qPCR Master mix (Solis Biodyne, Estonia), 0.5 µl of 5 pmol/µl  
411 forward and reverse primers, 2 µl of the DNA template from *Microsporidia MB* positive  
412 samples, and 5 µl nuclease-free PCR. The thermocycling conditions employed were an  
413 initial denaturation at 95°C for 15 min, followed by 35 cycles of denaturation at 95°C for 1  
414 min, annealing at 62°C for 90 s, and extension at 72°C for a further 60 s. Finally, melting  
415 curves were generated by melting analysis with temperature ranges from 65°C to 95°C.  
416 The PCR and qPCR was carried out on a MIC qPCR cyclor (BioMolecular Systems,  
417 Australia). Each sample was confirmed to have the characteristic melt curve associated  
418 with the *Microsporidia MB* MB18SF/ MB18SR primers.

419

## 420 **Data analysis**

421 All the data was tested for normality using the Shapiro-Wilk test. For non-normal  
422 unpaired data, a two tailed Mann–Whitney U test was used to determine the difference  
423 between the groups. In cases with more than two data groups, we used Kruskal-Wallis  
424 H test to determine the significance of differences between the groups. If significant, we  
425 carried out a Dunn's post hoc test. All statistical analyses were performed using  
426 Graphpad Prizm version 6.0c software or R (version 8.0.2). P-values of \* $p < 0.05$ ,  
427 \*\* $p < 0.01$ , \*\*\* $p < 0.001$  and \*\*\*\* $p < 0.0001$  were deemed to be statistically significant.  
428 Figures were created and/or edited using Adobe Illustrator (version 23.0.1).

429

## 430 **References**



- 431 1. World Health Organization. 2022. The World Malaria Report 2022.
- 432 2. Bhatt S, Weiss DJ, Cameron E, Bisanzio D, Mappin B, Dalrymple U, Battle KE,  
433 Moyes CL, Henry A, Eckhoff PA, Wenger EA, Briët O, Penny MA, Smith TA,  
434 Bennett A, Yukich J, Eisele TP, Griffin JT, Fergus CA, Lynch M, Lindgren F,  
435 Cohen JM, Murray CLJ, Smith DL, Hay SI, Cibulskis RE, Gething PW. 2015. The  
436 effect of malaria control on *Plasmodium falciparum* in Africa between 2000 and  
437 2015. *Nature* 526:207–211.
- 438 3. World Health Organization. 2018. Global report on insecticide resistance in  
439 malaria vectors: 2010–2016. World Health Organization.
- 440 4. Kabbale FG, Akol AM, Kaddu JB, Onapa AW. 2013. Biting patterns and  
441 seasonality of *Anopheles gambiae sensu lato* and *Anopheles funestus*  
442 mosquitoes in Kamuli District, Uganda. *Parasites and Vectors* 6:1–9.
- 443 5. World Health Organization. 2021. The World Malaria Report 2021.
- 444 6. Tadesse FG, Ashine T, Teka H, Esayas E, Messenger LA, Chali W, Meerstein-  
445 Kessel L, Walker T, Wolde Behaksra S, Lanke K, Heutink R, Jeffries CL,  
446 Mekonnen DA, Hailemeskel E, Tebeje SK, Tafesse T, Gashaw A, Tsegaye T,  
447 Emiru T, Simon K, Bogale EA, Yohannes G, Kedir S, Shumie G, Sabir SA,  
448 Mumba P, Dengela D, Kolaczinski JH, Wilson A, Churcher TS, Chibsa S, Murphy  
449 M, Balkew M, Irish S, Drakeley C, Gadisa E, Bousema T. 2021. *Anopheles*  
450 *stephensi* mosquitoes as vectors of *Plasmodium vivax* and *falciparum*, Horn of  
451 Africa, 2019. *Emerg Infect Dis* 27:603.
- 452 7. Ochomo EO, Milanoi S, Abong'o B, Onyango B, Muchoki M, Omoke D, Olanga E,  
453 Njoroge L, Juma E, Otieno JD MD. 2023. Molecular surveillance leads to the first

- 454 detection of *Anopheles stephensi* in Kenya.
- 455 8. Mnzava, A., Monroe, A. C., & Okumu F. 2022. *Anopheles stephensi* in Africa  
456 requires a more integrated response. *Malar J* 21:1–6.
- 457 9. Utarini A, Indriani C, Ahmad RA, Tantowijoyo W, Arguni E, Ansari MR, Supriyati  
458 E, Wardana DS, Meitika Y, Ernesia I, Nurhayati I, Prabowo E, Andari B, Green  
459 BR, Hodgson L, Cutcher Z, Rancès E, Ryan PA, O’Neill SL, Dufault SM,  
460 Tanamas SK, Jewell NP, Anders KL, Simmons CP. 2021. Efficacy of *Wolbachia*-  
461 infected mosquito deployments for the control of Dengue. *N Engl J Med*  
462 384:2177-2186.
- 463 10. Herren JK, Mbaisi L, Mararo E, Makhulu EE, Mobegi VA, Butungi H, Mancini MV,  
464 Oundo JW, Teal ET, Pinaud S, Lawniczak MKN, Jabara J, Nattoh G, Sinkins SP.  
465 2020. A microsporidian impairs *Plasmodium falciparum* transmission in  
466 *Anopheles arabiensis* mosquitoes. *Nat Commun* 11:2187.
- 467 11. Nattoh G, Maina T, Makhulu EE, Mbaisi L, Mararo E, Otieno FG, Bukhari T,  
468 Onchuru TO, Teal E, Paredes J, Bargul JL, Mburu DM, Onyango EA, Magoma G,  
469 Sinkins SP, Herren JK. 2021. Horizontal transmission of the symbiont  
470 *Microsporidia MB* in *Anopheles arabiensis*. *Front Microbiol* 12:647183.
- 471 12. Bukhari, T., Pevsner, R., and Herren JK. 2022. Microsporidia: a promising vector  
472 control tool for residual malaria transmission. *Front Trop Dis* 3:66.
- 473 13. Lipsitch M, Siller S, Nowak MA. 1996. The evolution of virulence in pathogens  
474 with vertical and horizontal transmission. *Evolution (N Y)* 50:1729–1741.
- 475 14. Knell RJ, Webberley KM. 2004. Sexually transmitted diseases of insects:  
476 Distribution, evolution, ecology and host behaviour. *Biol Rev Camb Philos Soc*.

- 477 15. Moran NA. 2006. Symbiosis. *Curr Biol* 16:866–871.
- 478 16. Cui Y, Franz AW. 2020. Heterogeneity of midgut cells and their differential  
479 responses to blood meal ingestion by the mosquito, *Aedes aegypti*. *Insect*  
480 *Biochem Mol Biol* 127:103496.
- 481 17. Hixson B, Taracena ML, Buchon N. 2021. Midgut epithelial dynamics are central  
482 to mosquitoes' physiology and fitness, and to the transmission of vector-borne  
483 disease. *Front Cell Infect Microbiol* 180.
- 484 18. Chrostek E, Marialva MSP, Esteves SS, Weinert LA, Martinez J, Jiggins FM,  
485 Teixeira L. 2013. *Wolbachia* variants induce differential protection to viruses in  
486 *Drosophila melanogaster*: A phenotypic and phylogenomic analysis. *PLoS Genet*  
487 9:e1003896.
- 488 19. López-Madrugal S, Duarte EH. 2019. Titer regulation in arthropod- *Wolbachia*  
489 symbioses. *FEMS Microbiol Lett* 366.
- 490 20. Min KT, Benzer S. 1997. *Wolbachia*, normally a symbiont of *Drosophila*, can be  
491 virulent, causing degeneration and early death. *Proc Natl Acad Sci U S A*  
492 94:10792-10796.
- 493 21. Albertson R, Casper-Lindley C, Cao J, Tram U, Sullivan W. 2009. Symmetric and  
494 asymmetric mitotic segregation patterns influence *Wolbachia* distribution in host  
495 somatic tissue. *J Cell Sci* 122:4570–4583.
- 496 22. Huho BJ, Ng'habi KR, Killeen GF, Nkwengulila G, Knols BGJ, Ferguson HM.  
497 2006. A reliable morphological method to assess the age of male *Anopheles*  
498 *gambiae*. *Malar J* 5:1–11.
- 499 23. Becnel JJ, Andreadis TG. 2014. Microsporidia in insects. *Microsporidia Pathog*

- 500 Oppor First Ed 521–570.
- 501 24. Mitchell SN, Catteruccia F. 2017. Anopheline reproductive biology: Impacts on  
502 vectorial capacity and potential avenues for malaria control. Cold Spring Harb  
503 Perspect Med.
- 504 25. Attardo GM, Hansen IA, Raikhel AS. 2005. Nutritional regulation of vitellogenesis  
505 in mosquitoes: Implications for anautogeny. *Insect Biochem Mol Biol* 35:661-675.
- 506 26. Herren JK, Paredes JC, Schüpfer F, Arafah K, Bulet P, Lemaitre B. 2014. Insect  
507 endosymbiont proliferation is limited by lipid availability. *Elife* 3:e02964.
- 508 27. Valzania L, Mattee MT, Strand MR, Brown MR. 2019. Blood feeding activates the  
509 vitellogenic stage of oogenesis in the mosquito *Aedes aegypti* through inhibition of  
510 glycogen synthase kinase 3 by the insulin and TOR pathways. *Dev Biol* 454:85–  
511 95.
- 512 28. Santolamazza F, Mancini E, Simard F, Qi Y, Tu Z, Della Torre A. 2008. Insertion  
513 polymorphisms of SINE200 retrotransposons within speciation islands of  
514 *Anopheles gambiae* molecular forms. *Malar J* 7:1–10.
- 515 29. Kajla MK, Barrett-Wilt GA, Paskewitz SM. 2019. Bacteria: A novel source for  
516 potent mosquito feeding-deterrents. *Sci Adv* 5:eaau6141.
- 517 30. Schneider CA, Rasband WS, Eliceiri KW. 2012. NIH Image to ImageJ: 25 years of  
518 image analysis. *Nat Methods* 9:671-675.
- 519 31. Herren JK, Lemaitre B. 2011. *Spiroplasma* and host immunity: Activation of  
520 humoral immune responses increases endosymbiont load and susceptibility to  
521 certain Gram-negative bacterial pathogens in *Drosophila melanogaster*. *Cell*  
522 *Microbiol* 13:1385-1396.

523

## 524 **Acknowledgement**

525 The study was supported by Open philanthropy (grant no.). The funders had no role in  
526 study design, data collection, and analysis, decision to publish, or preparation of the  
527 manuscript. We also thank the support provided by the *icipe* insectary team (Milcah  
528 Gitau, Jeniffer Thiong'o, Peris Wambui, David Alila, and Charles Amara), field work  
529 team (Gerald Ronoh and Robinson Kisero) and the project administrator Faith Kyengo.

530

## 531 **Data accessibility**

532 The following data will be submitted to the Dryad repository: *Microsporidia MB*  
533 localization and prevalence in adult tissues, prevalence and density in larvae vs adults,  
534 effect of bloodfeeding on prevalence and density of *Microsporidia MB*, density of  
535 *Microsporidia MB* in the *An. arabiensis* gonad and gut across different ages.

536

## 537 **Author contributions**

538 EEM – Conceptualization, data curation, validation, visualization, formal analysis,  
539 investigation, methodology, writing – original draft, writing – review & editing.

540 TOO – Data curation, validation, visualization, formal analysis, investigation,  
541 methodology, supervision, writing – original draft, writing – review & editing.

542 JG, FGO, AWW, JNM – Investigation, writing – review & editing.

543 LK – Conceptualization, supervision, writing – review & editing.

544 JKH – Conceptualization, data curation, formal analysis, funding acquisition,

545 methodology, supervision, validation, visualization, writing – original draft, writing –  
546 review & editing.
